# Supplementary material for: Serelaxin improves cardiac and renal function in DOCA-salt hypertensive rats
Source: PubMed Central journal article supplement (PMC5574886; doi:10.1038/s41598-017-09470-0), 2017-08-29
Supplement: 41598_2017_9470_MOESM1_ESM.pdf [file 41598_2017_9470_MOESM1_ESM.pdf]

## Supplemental information:

TITLE: Serelaxin improves cardiac and renal function in DOCA-salt hypertensive rats

Dong Wang<sup>1</sup>, Yuhuan Luo<sup>1</sup>, Komuraiah Myakala<sup>1</sup>, David J. Orlicky<sup>2</sup>, Evgenia Dobrinskikh<sup>1</sup>, Xiaoxin Wang<sup>1</sup>, Moshe Levi<sup>1</sup>

**AUTHORS:** Departments of Medicine<sup>1</sup>and Pathology<sup>2</sup>, Division of Renal Diseases and Hypertension, University of Colorado AMC, Aurora, Colorado 80045

### Supplementary Table S1: Primers used for real-time PCR

| Gene   | Primer sequence                                       |
|--------|-------------------------------------------------------|
| FATP1  | F-GGGTTTGCAAGCCAGAGA<br>R-CAAAGCAGCCCCAATGAG          |
| ChREBP | F-CGACACTCACCCGCCTCTTC<br>R-TTGTTTCAGCCGAATCTTGTC     |
| ABCA1  | F-ACGAGATTGATGACCGCCTC<br>R-AGCATCCACCCCACTCTCTTC     |
| ACOX1  | F-CTCACTCGAAGCCAGCGTTA<br>R-TTGAGGCCAACAGGTTCCAC      |
| Srebp1 | F-TGGCGGGCACTACTTAGGAA<br>R-GCAACACTGGCAGAGATCTACGT   |
| 36b4   | F-AAGGAAGAGTCGGAGGAATC<br>R-GGCTGACTTGGTGTGAGG        |
| Srebp2 | F-TGACTGGATGATGCCGACTC<br>R-GTGACCGAGGAGCGTGAG        |
| NFκB   | F-TGCAGAAAGAAGACATTGAGGTG<br>R-AGGCTAGGGTCAGCGTATGG   |
| MCP1   | F-GGCCTGTTGTTACAGTTGCT<br>R-TCTCACTTGGTTCTGGTCCAGT    |
| ICAM-1 | F-GCCCGGAGGATCACAAACGAC<br>R-CCTGGGGCTGGCATGTAAGAGT   |
| VCAM-1 | F-ACAAAACGCTCGCTCAGATT<br>R-GTCCATGGTCAGAACGGACT      |
| Col1A  | F-ATCAGCCCAAACCCCAAGGAGA<br>R-CGCAGGAAGGTCAGCTGGATAG  |
| Col3A  | F-TGATGGGATCCAATGAGGGAGA<br>R-GAGTCTCATGGCCTTGCGTGTTT |
| HMGCR  | F-GGTTCTTGTTACGCTCA<br>R-ATTCTCTTGGACACATCTTCA        |
| IL1    | F-AATCTCACAGCAGCATCTC<br>R-AGCAGGTCGTCATCC            |
| IL6    | F-CTTCCAGCCAGTTGCCTTCTTG<br>R-TGGTCTGTTGTGGGTGGTATCC  |
| TGFβ1  | F-ACCGCAACAACGCAATCTAT<br>R-ACGCCAGGAATTGTTGCTAT      |
| LDLR   | F-CCAGTGCGGCGTAGGATT<br>R-GGGACTCATCGGAGCCAT          |
| α-MHC  | F-TGTGGTGCCTCGTTCCA<br>R-TTTCGGAGGTAAGGGCTG           |
| β-MHC  | F-TTGGCACGGACTGCGTCATC<br>R-GAGCCTCCAGAGTTTGCTGAAGGA  |

---

|       |                         |
|-------|-------------------------|
| ANF   | F-ATCTGATGGATTTCAAGAACC |
|       | R-CTCTGAGACGGGTTGACTTC  |
| BNP   | F-ACAATCCACGATGCAGAAGCT |
|       | R-GGGCCTTGGTCCTTTGAGA   |
| SERCA | F-GCCTCTTAACCCTGCTGTTG  |
|       | R-GGGACTTTTGCTACCAGGTG  |

---

**Supplemental figure 1.** The whole cropped blots presented in figures 4h. Cropped gels blots are used here. PVDF membranes for Western Blot were cut into strips to minimize the amount of antibodies and incubate several antibodies that are necessary for analysis.

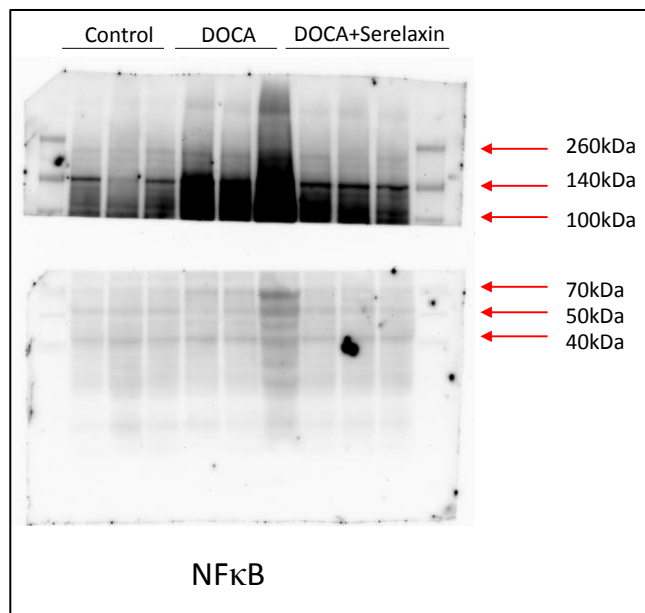

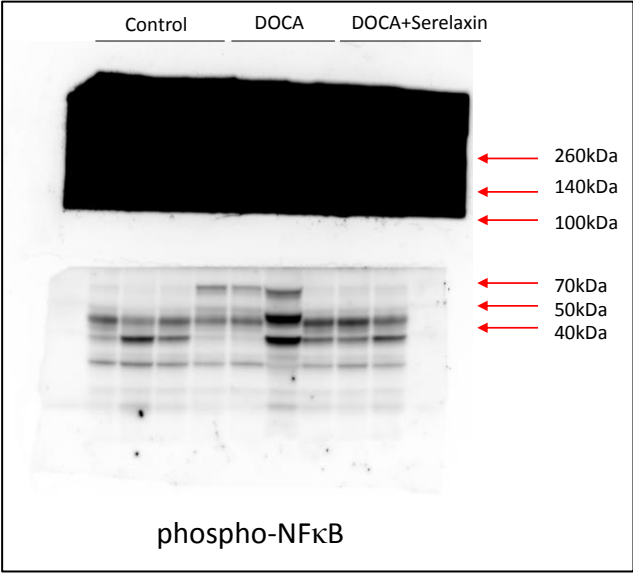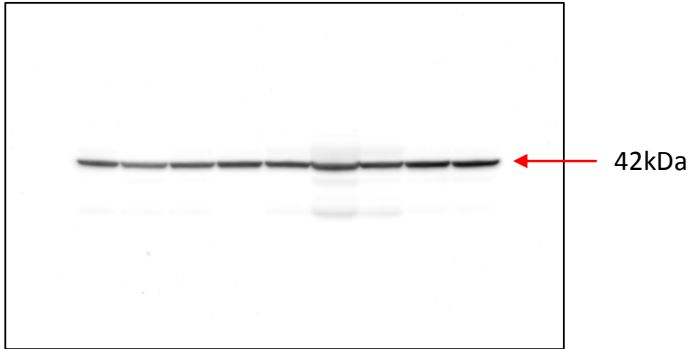

β-actin
